# Supplementary material
Source: PubMed Central journal article supplement (PMC7104066)
Supplement: mmc1.pdf [file mmc1.pdf]

## Supplementary Material

### Rapid Multiplex Microfiber-Based Immunoassay for Anti-MERS Antibody Detection

Carlton F. O. Hoy<sup>a</sup>, Keiichiro Kushiro<sup>a</sup>, Yutaro Yamaoka<sup>b,c</sup>, Akihide Ryo<sup>b</sup>, Madoka Takai<sup>a\*</sup>

<sup>a</sup>*Department of Bioengineering, School of Engineering, The University of Tokyo, Tokyo, Japan*

<sup>b</sup>*Department of Microbiology, School of Medicine, Yokohama City University, Yokohama, Japan*

<sup>c</sup>*Isehara Research Laboratory, Technology and Development Division, Kanto Chemical Co., Inc., Isehara, Japan*

*\*Corresponding author:*

*Tel (+81) 3-5841-7125, e-mail takai@bis.t.u-tokyo.ac.jp (M. Takai)*

---

#### Supplementary Tables

**Table S1. Processing and environmental conditions for the electrospinning of PS.**

|                         |            |
|-------------------------|------------|
| <b>Rotational Speed</b> | 2 m/min    |
| <b>Traverse Speed</b>   | 0.5 cm/sec |
| <b>Syringe Speed</b>    | 20 mm/sec  |
| <b>Working Distance</b> | 17 cm      |
| <b>Voltage</b>          | 25 kV      |
| <b>Processing Time</b>  | 20 min     |
| <b>Temperature</b>      | 25°C       |
| <b>Humidity</b>         | 60%        |

**Table S2. Detailed descriptions of reagents consumed in the rapid immunoassay protocol together with total processing, analysis and overall total time necessary.**

| <b>Steps</b>                    | <b>Sample Type</b>                      | <b>Reagent Consumption</b> | <b>Processing Time</b> | <b>Diluent</b> |
|---------------------------------|-----------------------------------------|----------------------------|------------------------|----------------|
| O <sub>2</sub> Plasma Treatment | ESPS 10wt% - 8 layer                    | N/A                        | 3 min                  | N/A            |
| Antigen Immobilization          | HSA                                     | 200 µg/mL (6 µL)           | <1 min                 | PBS            |
|                                 | His-MERS-N                              | 200 µg/mL (6 µL)           |                        | PBS            |
| Blocking                        | Skim Milk                               | 2 w/v (2 mL)               | 1 min                  | PBS-T          |
| Antibody                        | FITC-Conjugated Goat Anti-Human Albumin | 1:100 (1 mL)               | 1 min                  | PBS-T          |
|                                 | FITC-Conjugated MERS NP #20             | 1:50 (1 mL)                |                        | PBS-T          |
|                                 |                                         |                            |                        |                |
|                                 |                                         |                            |                        |                |
